# Supplementary material for: A MoS2/CuO-based hybrid p–n junction for high-performance self-powered photodetection
Source: Royal Society of Chemistry journal article supplement (doi:10.1039/d2tc02812c), 2022-01-01
Supplement: d2tc02812c1.pdf [file d2tc02812c1.pdf]

## Supporting Information

### **MoS<sub>2</sub>/CuO-Based Hybrid p-n Junction for High-Performance Self-Powered Photodetection**

<sup>a</sup>Kishan Lal Kumawat, <sup>a,b</sup>Pius Augustine, <sup>a,c</sup>Deependra Kumar Singh, <sup>a</sup>Saluru Baba Krupanidhi, <sup>a,c,d</sup>Karuna Kar Nanda.

<sup>a</sup>Materials Research Centre, Indian Institute of Science, Bangalore 560012, India.

<sup>b</sup>Materials Research Laboratory, Sacred Heart College (Autonomous), Thevara, Kochi, 682013, India.

<sup>c</sup>Institute of Physics, Bhubaneswar – 751005, India and

<sup>d</sup>Homi Bhabha National Institute, Mumbai-400094, India

**Corresponding Authors email:** [nanda@iisc.ac.in](mailto:nanda@iisc.ac.in) , [sbk@iisc.ac.in](mailto:sbk@iisc.ac.in)

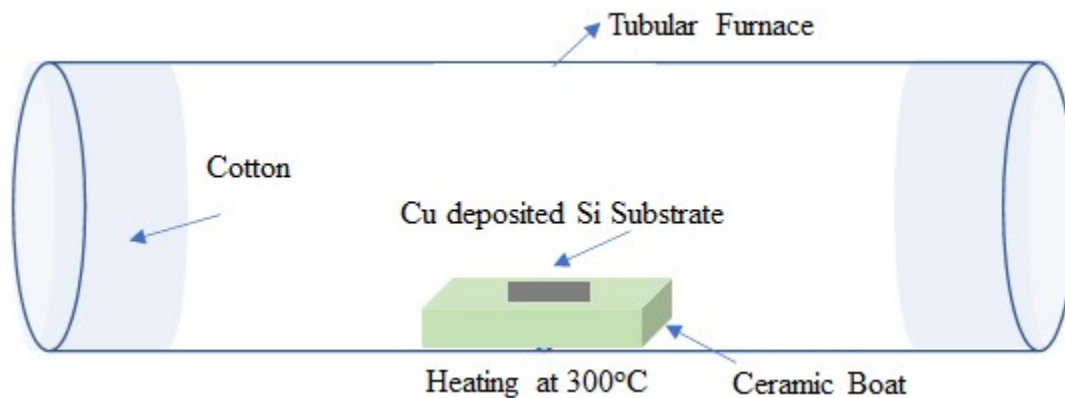

Figure S1 Tubular furnace set up to oxidise sputtered Cu film.

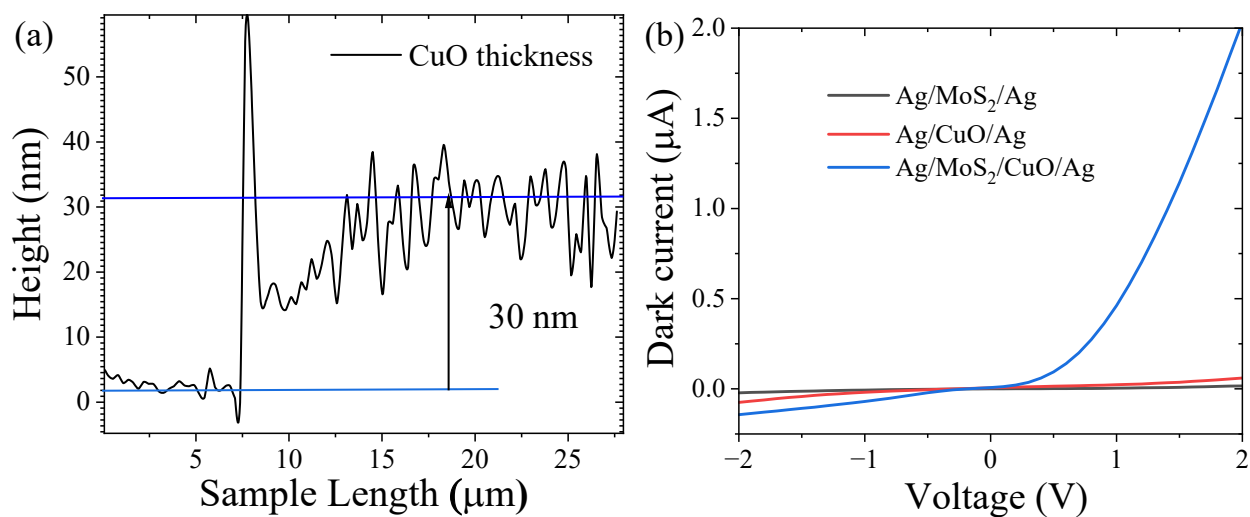

Figure S2 (a) AFM image showing the thickness of CuO. (b) Dark I-V characteristics of individual Ag/MoS<sub>2</sub>/Ag, Ag/CuO/Ag MSM devices and Ag/MoS<sub>2</sub>/CuO/Ag heterostructure device.

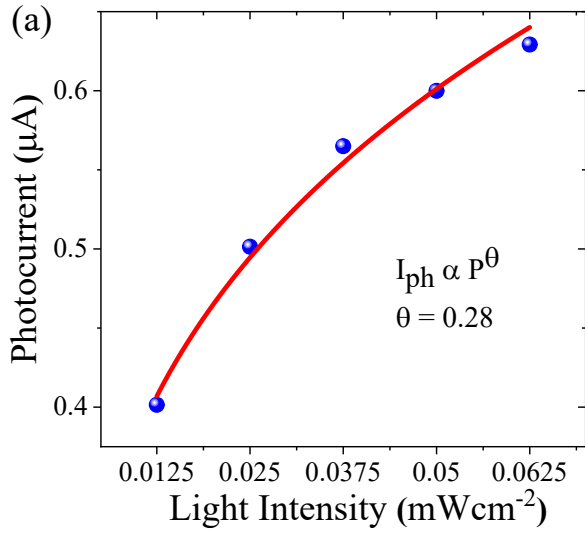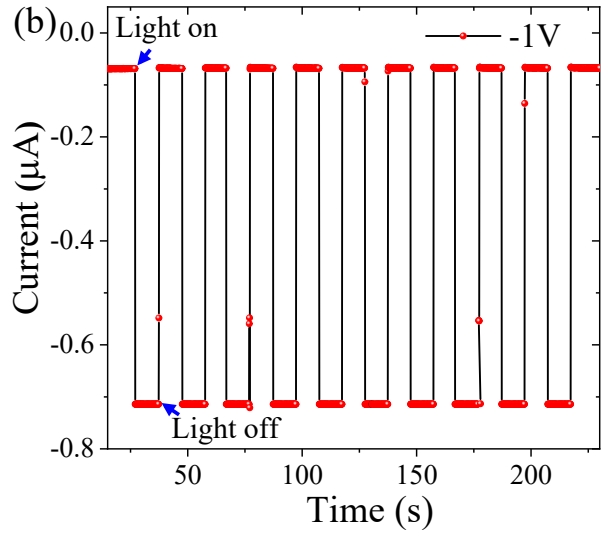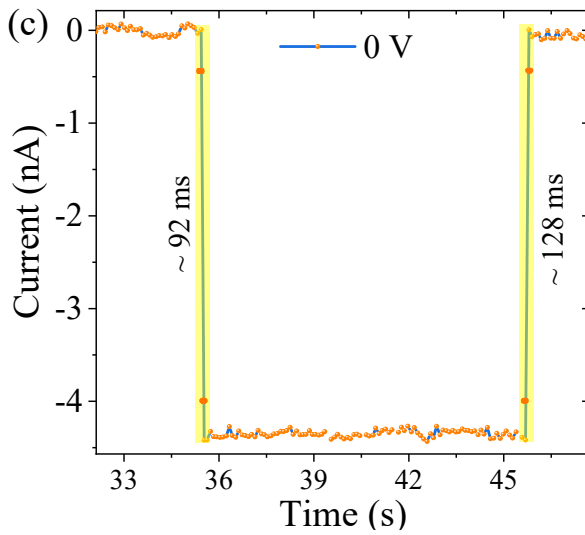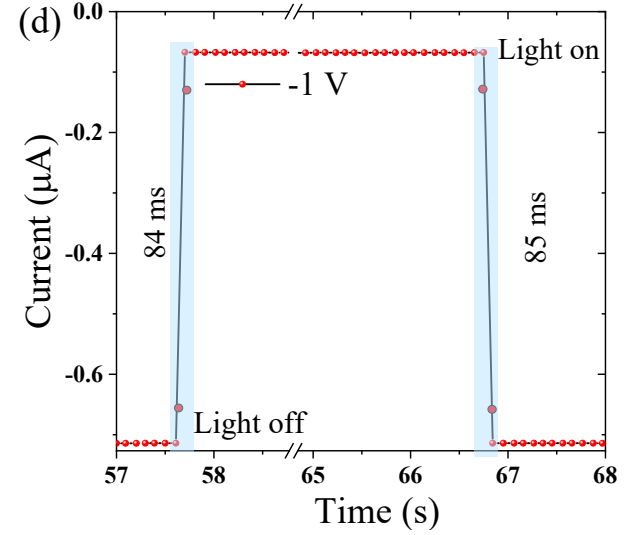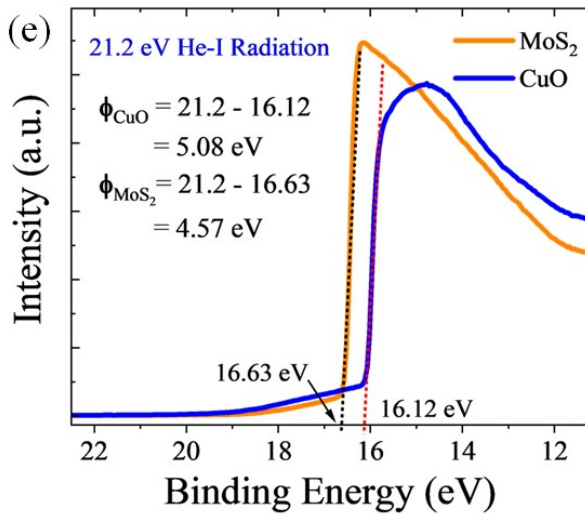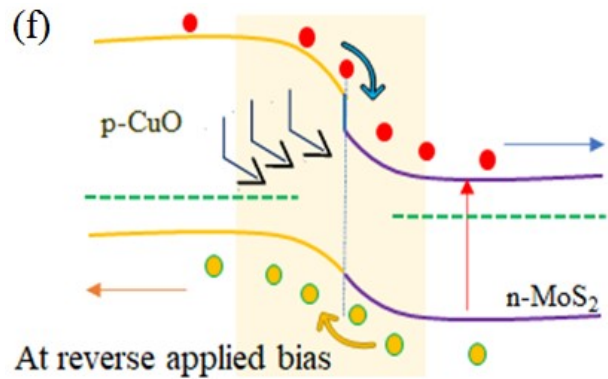

Figure S3 (a) Photocurrent vs light intensity at -1.0 V applied bias. (b) Current on/off switching behavior of MoS<sub>2</sub>/CuO device at -1.0 V applied bias. Transient photoresponse to determine the photodetection speed at (c) zero bias (d) -1.0 V. (e) UPS spectra of MoS<sub>2</sub> and CuO to determine work function and (f) Band alignment of MoS<sub>2</sub>/CuO p-n heterojunction at applied reverse bias of -1.0 V.
